# Supplementary material for: P2 × 7 Receptor Inhibits Astroglial Autophagy via Regulating FAK- and PHLPP1/2-Mediated AKT-S473 Phosphorylation Following Kainic Acid-Induced Seizures
Source: PubMed Central journal article supplement (PMC7555659; doi:10.3390/ijms21186476), 2020-09-04
Supplement: ijms-21-06476-s001.pdf [file ijms-21-06476-s001.pdf]

**Supplementary information**

**P2X7 receptor inhibits astroglial autophagy via regulating FAK- and  
PHLPP1/2-mediated AKT-S473 phosphorylation following kainic acid-  
induced seizures**

Duk-Shin Lee<sup>1</sup> and Ji-Eun Kim<sup>1,\*</sup>

*<sup>1</sup>Department of Anatomy and Neurobiology, Institute of Epilepsy Research, College of Medicine, Hallym University, Chuncheon 200-702, South Korea*

\* Correspondence to: J.-E Kim, Department of Anatomy and Neurobiology, College of Medicine, Hallym University, Chuncheon, Kangwon-Do 24252, South Korea; Tel: +82-33-248-2522; Fax: +82-33-248-2525; E-mail: jieunkim@hallym.ac.kr

**Supplementary Table 1. Primary antibodies used in the present study**

| Antibody           | Host          | Manufacturer<br>(catalog number) | Dilution used                           |
|--------------------|---------------|----------------------------------|-----------------------------------------|
| AKT                | Rabbit        | Cell signaling<br>(#9272)        | 1:1,000 (WB)<br>1:50 (IP)               |
| AMPK               | Rabbit        | Abcam<br>(ab3759)                | 1:1,000 (WB)                            |
| Bif-1              | Rabbit        | Cell signalling<br>(#4427)       | 1:1,000 (WB)                            |
| ERK1/2             | Rabbit        | Biorbyt<br>(orb160960)           | 1:1,000 (WB)                            |
| FAK                | Rabbit        | Proteintech<br>(12636-1-AP)      | 1:1,000(WB)                             |
| GFAP               | Mouse         | Millipore<br>(mab3402)           | 1:4,000 (IF)                            |
| GSK3 $\beta$       | Rabbit        | Elapscience<br>(ENT2082)         | 1:1,000 (WB)                            |
| HSP25              | Rabbit        | Enzo<br>(ADI-SPA-801)            | 1:1,000 (WB)<br>1:500 (IF)<br>1:50 (IP) |
| Iba-1              | Rabbit        | Biocare Medical (CP<br>290)      | 1:500 (IH)                              |
| LAMP1              | Rabbit        | Lifespan<br>(LS-B580)            | 1:1,000 (WB)<br>1:200 (IF)              |
| mTOR               | Rabbit        | Cell signalling<br>(2972S)       | 1:1,000 (WB)                            |
| NeuN               | Guinea<br>pig | Millipore<br>(#ABN90P)           | 1:1000 (IH)                             |
| p-GSK3 $\beta$ -S9 | Rabbit        | Biorbyt<br>(orb14745)            | 1:1,000 (WB)                            |
| p-AKT-S473         | Rabbit        | Cell signalling<br>(#4060)       | 1:1,000 (WB)                            |
| p-AKT-T450         | Rabbit        | Cell signalling<br>(9267S)       | 1:1,000 (WB)                            |
| p-AMPK-T172        | Rabbit        | Abcam<br>(ab195946)              | 1:1,000 (WB)                            |
| p-ERK1/2           | Rabbit        | Bioss (bs-3330R)                 | 1:1,000 (WB)                            |
| p-FAK-Y397         | Rabbit        | Cell signaling<br>(#8556)        | 1:1,000(WB)<br>1:50 (IF)                |
| p-FAK-Y576         | Rabbit        | Novusbio<br>(NBP1-72238)         | 1:1,000(WB)                             |
| p-mTOR-S2448       | Rabbit        | Cell signalling<br>(2971S)       | 1:1,000 (WB)                            |
| p-mTOR-S2481       | Rabbit        | Cell signalling<br>(2974S)       | 1:1,000 (WB)                            |
| p-p70S6K-T389      | Rabbit        | Cell signalling<br>(#9205)       | 1:1,000 (WB)                            |
| p-PDK1-S241        | Rabbit        | Cell signaling<br>(#3061)        | 1:1,000(WB)                             |

|                |        |                          |                           |
|----------------|--------|--------------------------|---------------------------|
| p-PI3K-Y458    | Rabbit | Cell signalling (4228S)  | 1:1,000 (WB)              |
| p-PRAS40-T246  | Rabbit | Abcam (ab134084)         | 1:1,000 (WB)              |
| p-PTEN         | Rabbit | Cell signalling (#9549)  | 1:1,000 (WB)              |
| p-Raptor-S792  | Rabbit | Cell signaling (#2083)   | 1:1,000(WB)               |
| p-Rictor-T1135 | Rabbit | Cell signaling (#3806)   | 1:1,000(WB)               |
| p-SP1-T739     | Rabbit | Abcam (ab195733)         | 1:1,000 (WB)              |
| p-ULK1-S555    | Rabbit | Cell signalling (#5869)  | 1:1,000 (WB)<br>1:50 (IF) |
| p-ULK1-S757    | Rabbit | Cell signalling (#14202) | 1:1,000 (WB)              |
| p70S6K         | Rabbit | Proteintech (14485-1-AP) | 1:1,000 (WB)              |
| PKD1           | Rabbit | Cell signaling (#3062)   | 1:1,000 (WB)              |
| PHLPP1         | Rabbit | Millipore (#07-1341)     | 1:1,000 (WB)              |
| PHLPP2         | Rabbit | Abcam (ab71973)          | 1:2,000 (WB)              |
| PI3K           | Rabbit | Cell signalling (4292S)  | 1:1,000 (WB)              |
| PRAS40         | Rabbit | Abcam (ab181408)         | 1:1,000 (WB)              |
| PTEN           | Rabbit | Abcam (ab32199)          | 1:10,000 (WB)             |
| Raptor         | Rabbit | Cell signaling (#2280)   | 1:1,000 (WB)              |
| Rictor         | Rabbit | Cell signaling (#2114)   | 1:1,000 (WB)              |
| RIP            | Mouse  | Millipore (MAB1580)      | 1:5,000 (IF)              |
| SP1            | Rabbit | Elapscience (ENT3472)    | 1:1,000 (WB)              |
| ULK1           | Rabbit | Cell signalling (#8054)  | 1:1,000 (WB)              |
| $\beta$ -actin | Mouse  | Sigma (A5316)            | 1:5,000 (WB)              |

Co-IP, Co-immunoprecipitation; IF, Immunofluorescence; WB, Western blot.

**Fig. 1**

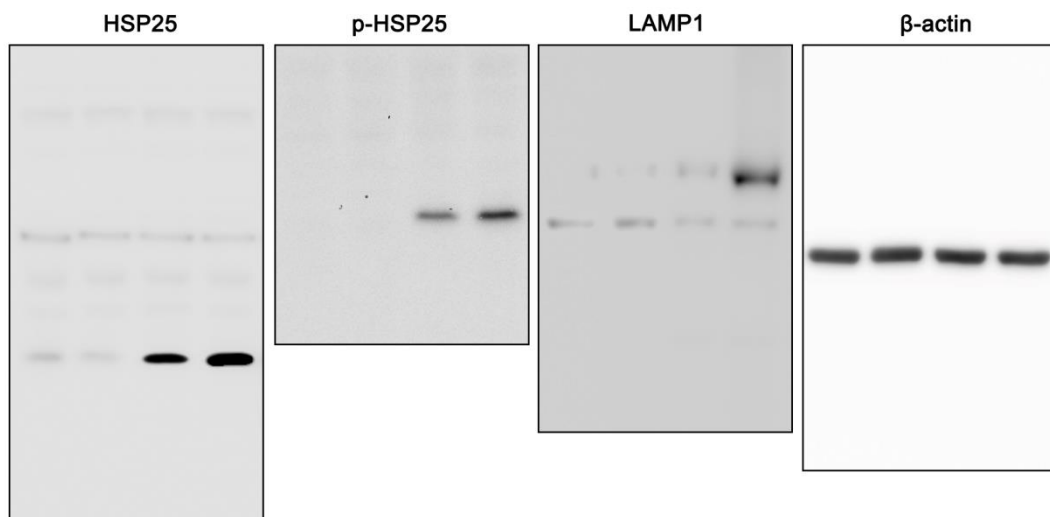

**Supplementary Figure 1.** Full-length gel images of Western blot data in Fig. 1.

**Fig. 2**

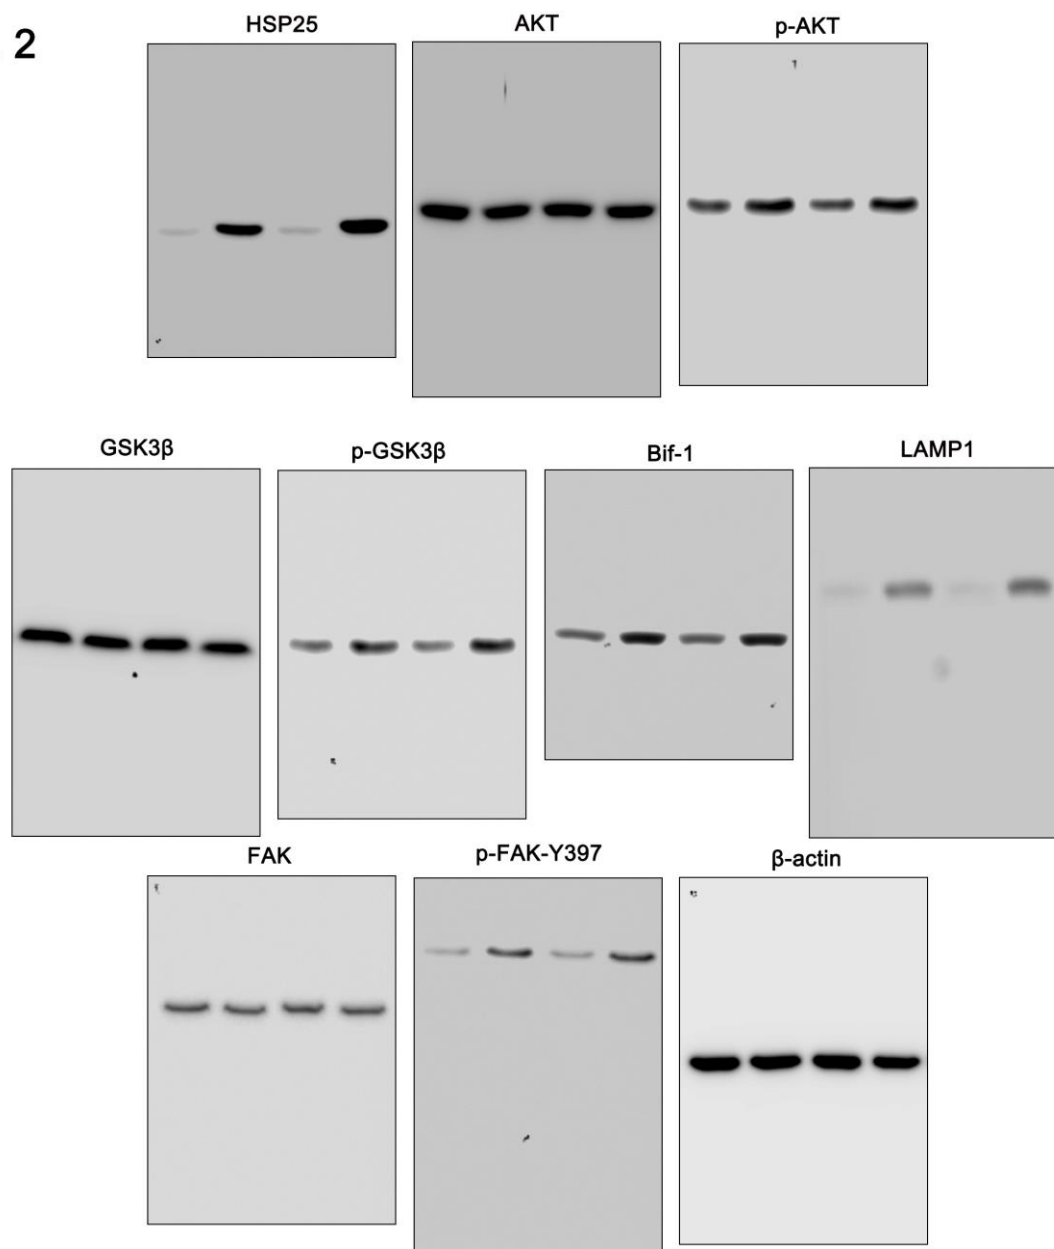

**Supplementary Figure 2.** Full-length gel images of Western blot data in Fig. 2.

**Fig. 3**

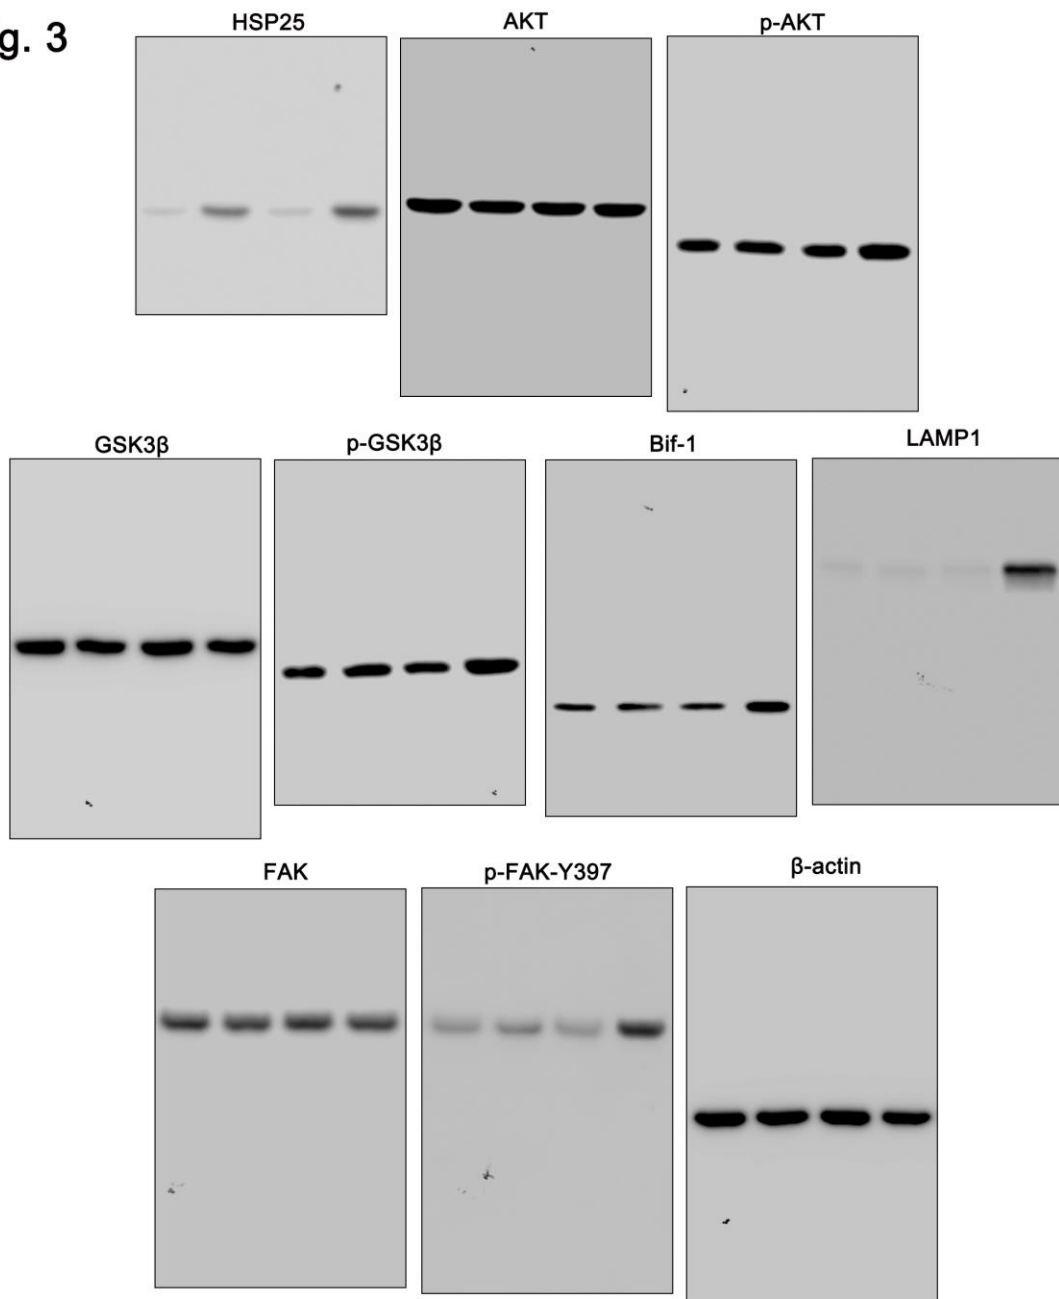

**Supplementary Figure 3.** Full-length gel images of Western blot data in Fig. 3.

Fig. 4

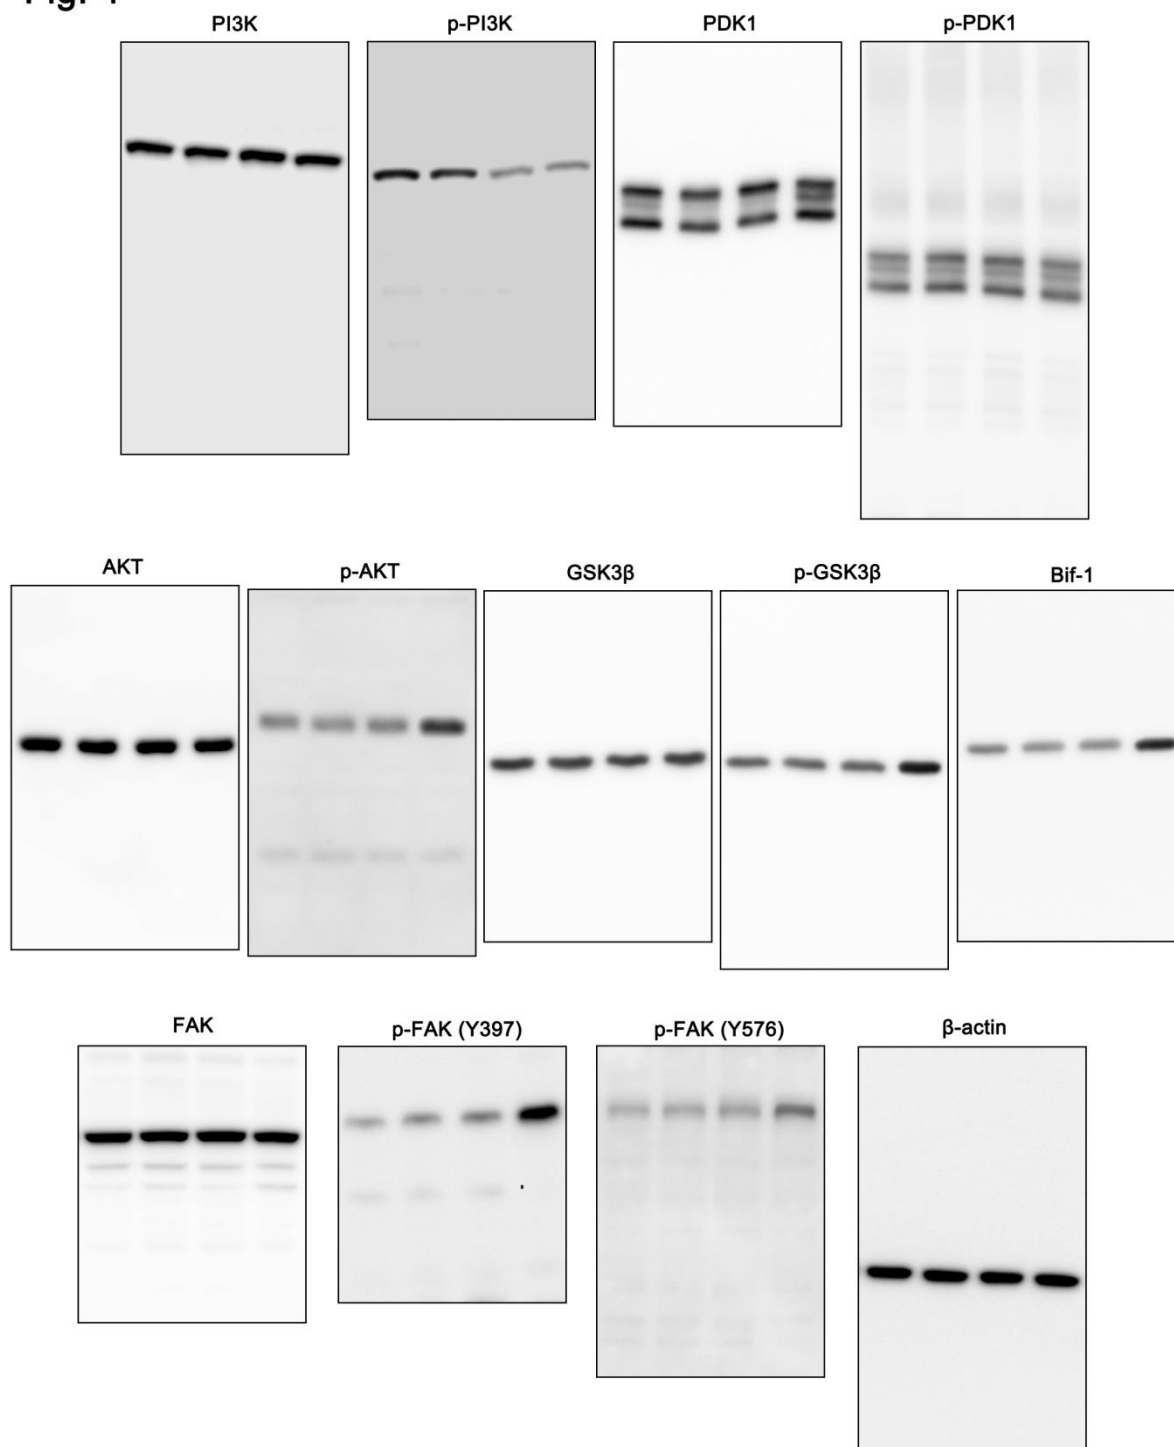

Supplementary Figure 4. Full-length gel images of Western blot data in Fig. 4.

**Fig. 5**

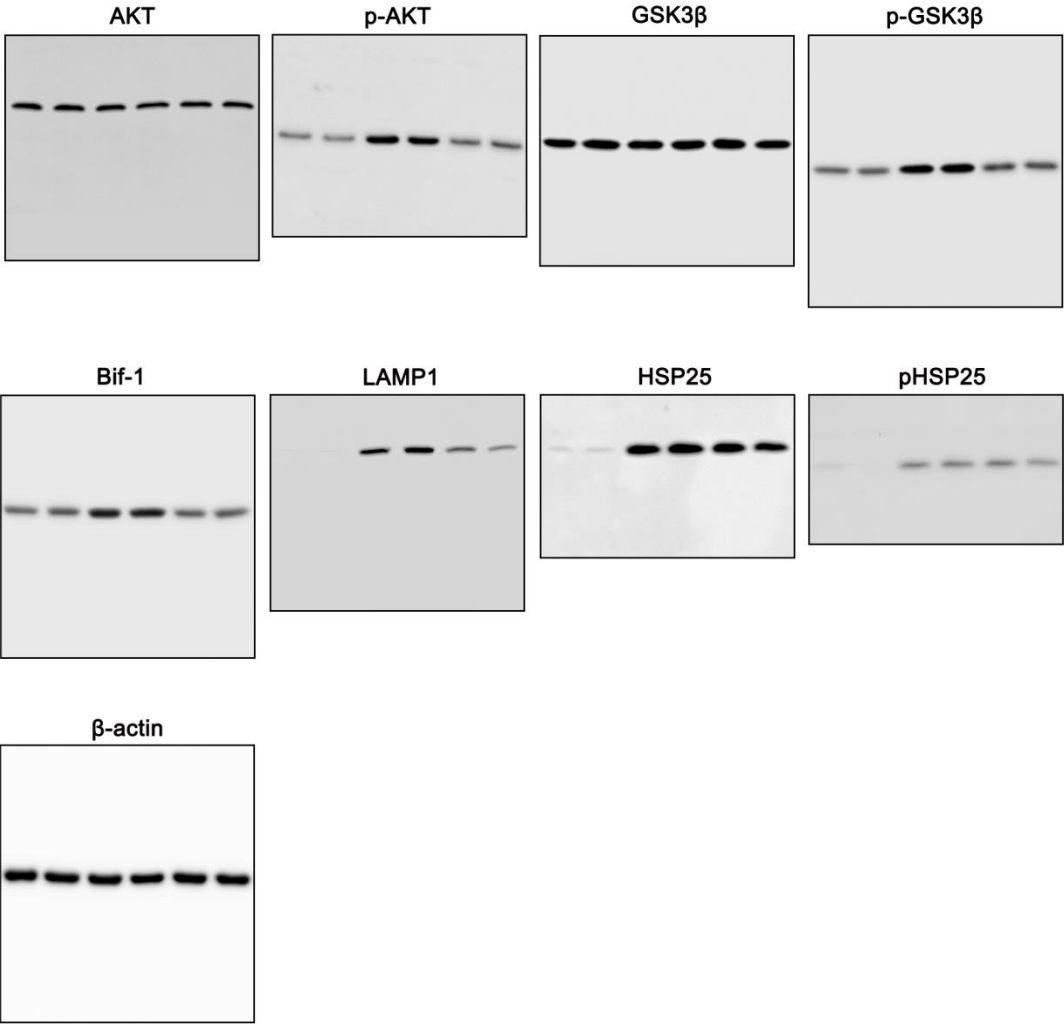

**Supplementary Figure 5.** Full-length gel images of Western blot data in Fig. 5.



**Fig. 6**

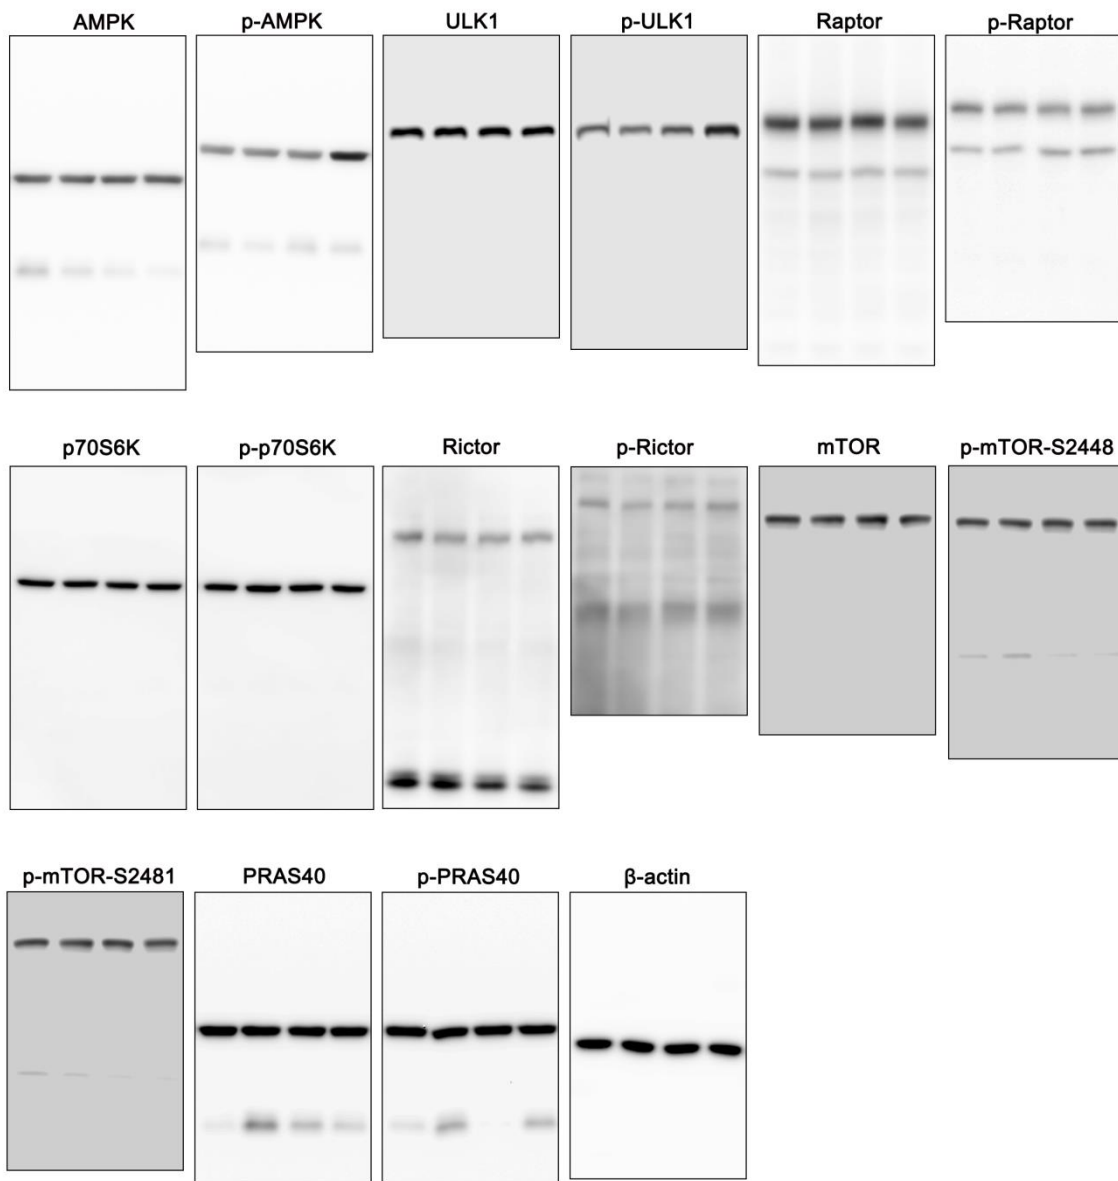

**Supplementary Figure 6.** Full-length gel images of Western blot data in Fig. 6.

**Fig. 7**

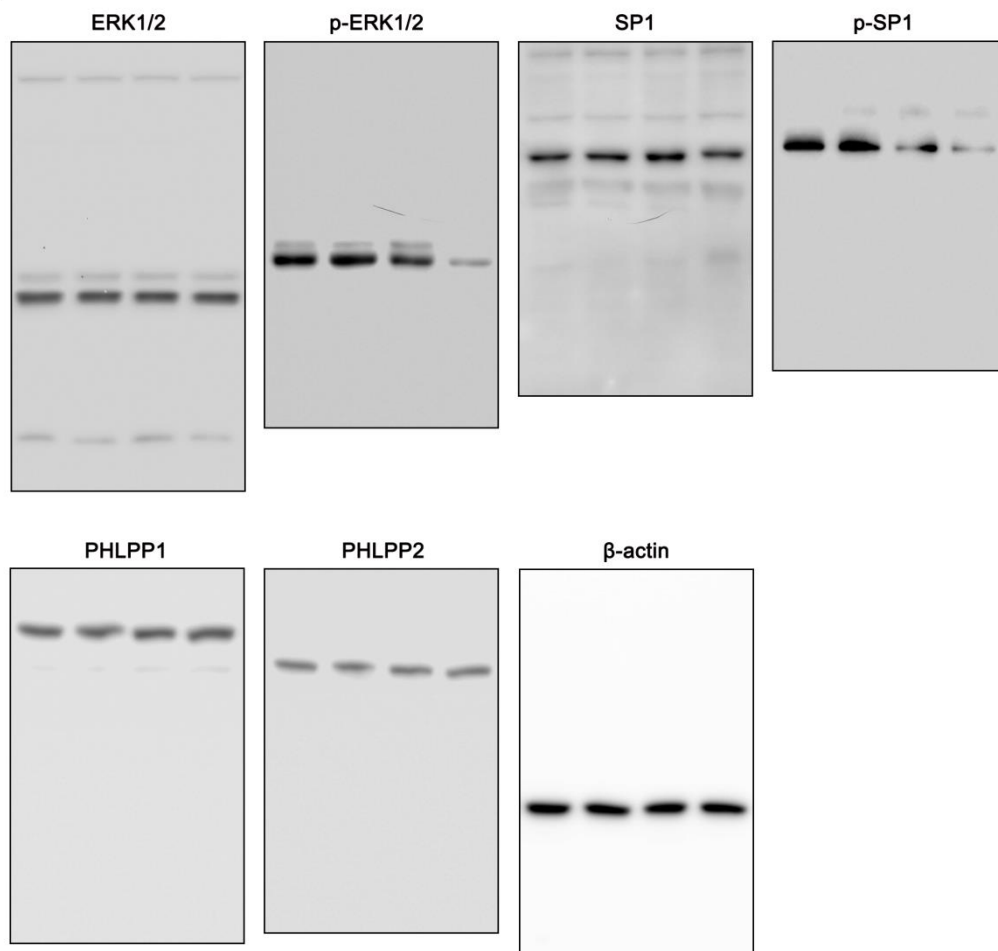

**Supplementary Figure 7.** Full-length gel images of Western blot data in Fig. 7.

**Fig. 8**

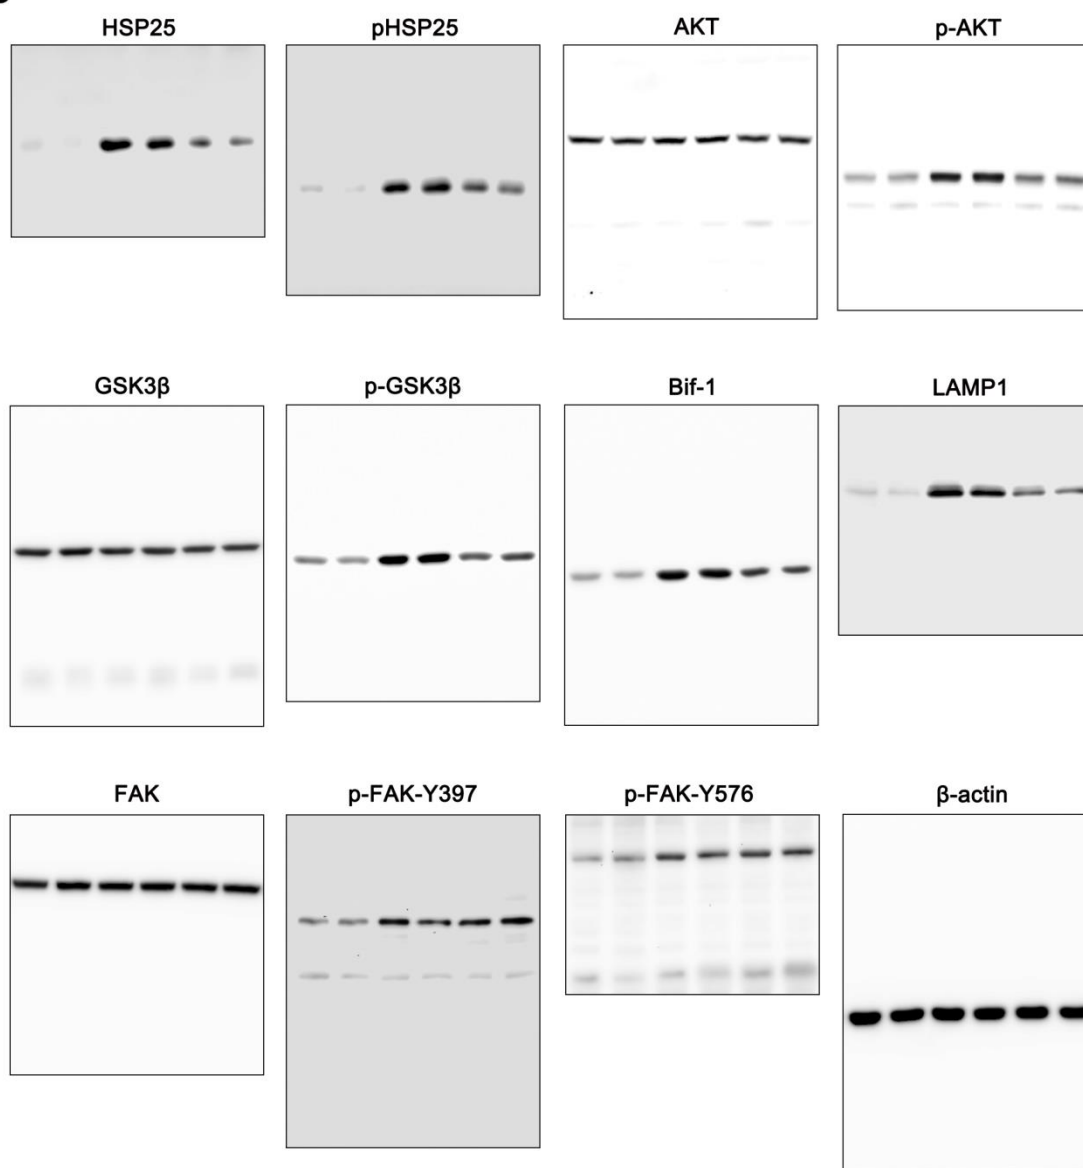

**Supplementary Figure 8.** Full-length gel images of Western blot data in Fig. 8.

Fig. 9A

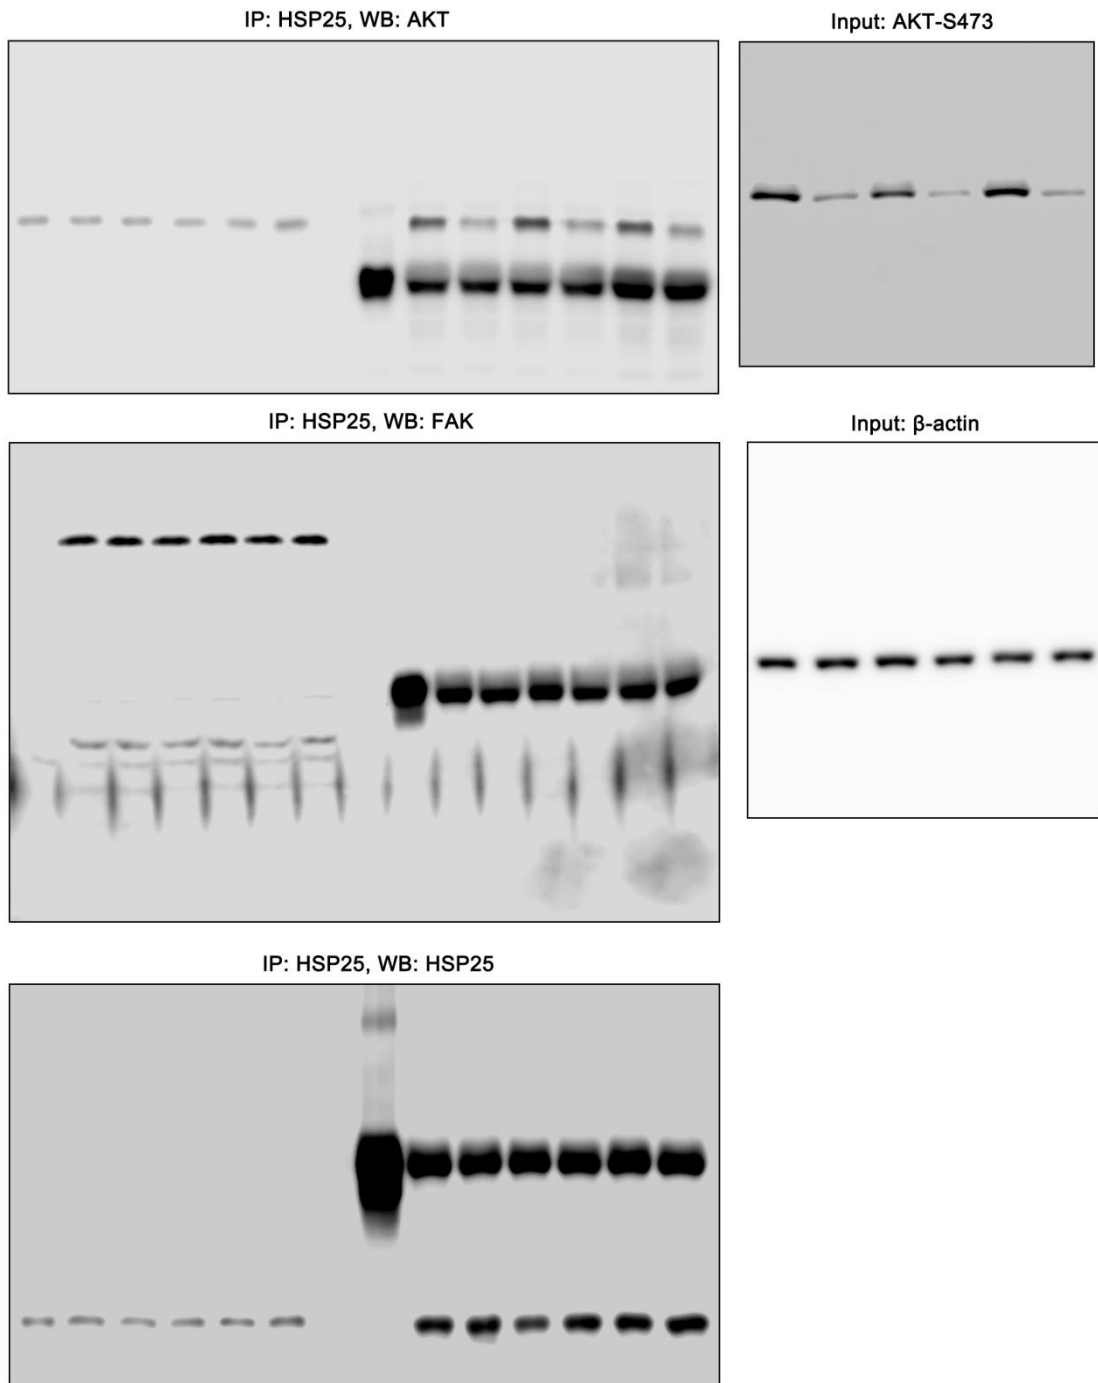

Supplementary Figure 9. Full-length gel images of Western blot data in Fig. 9A.

Fig. 9C

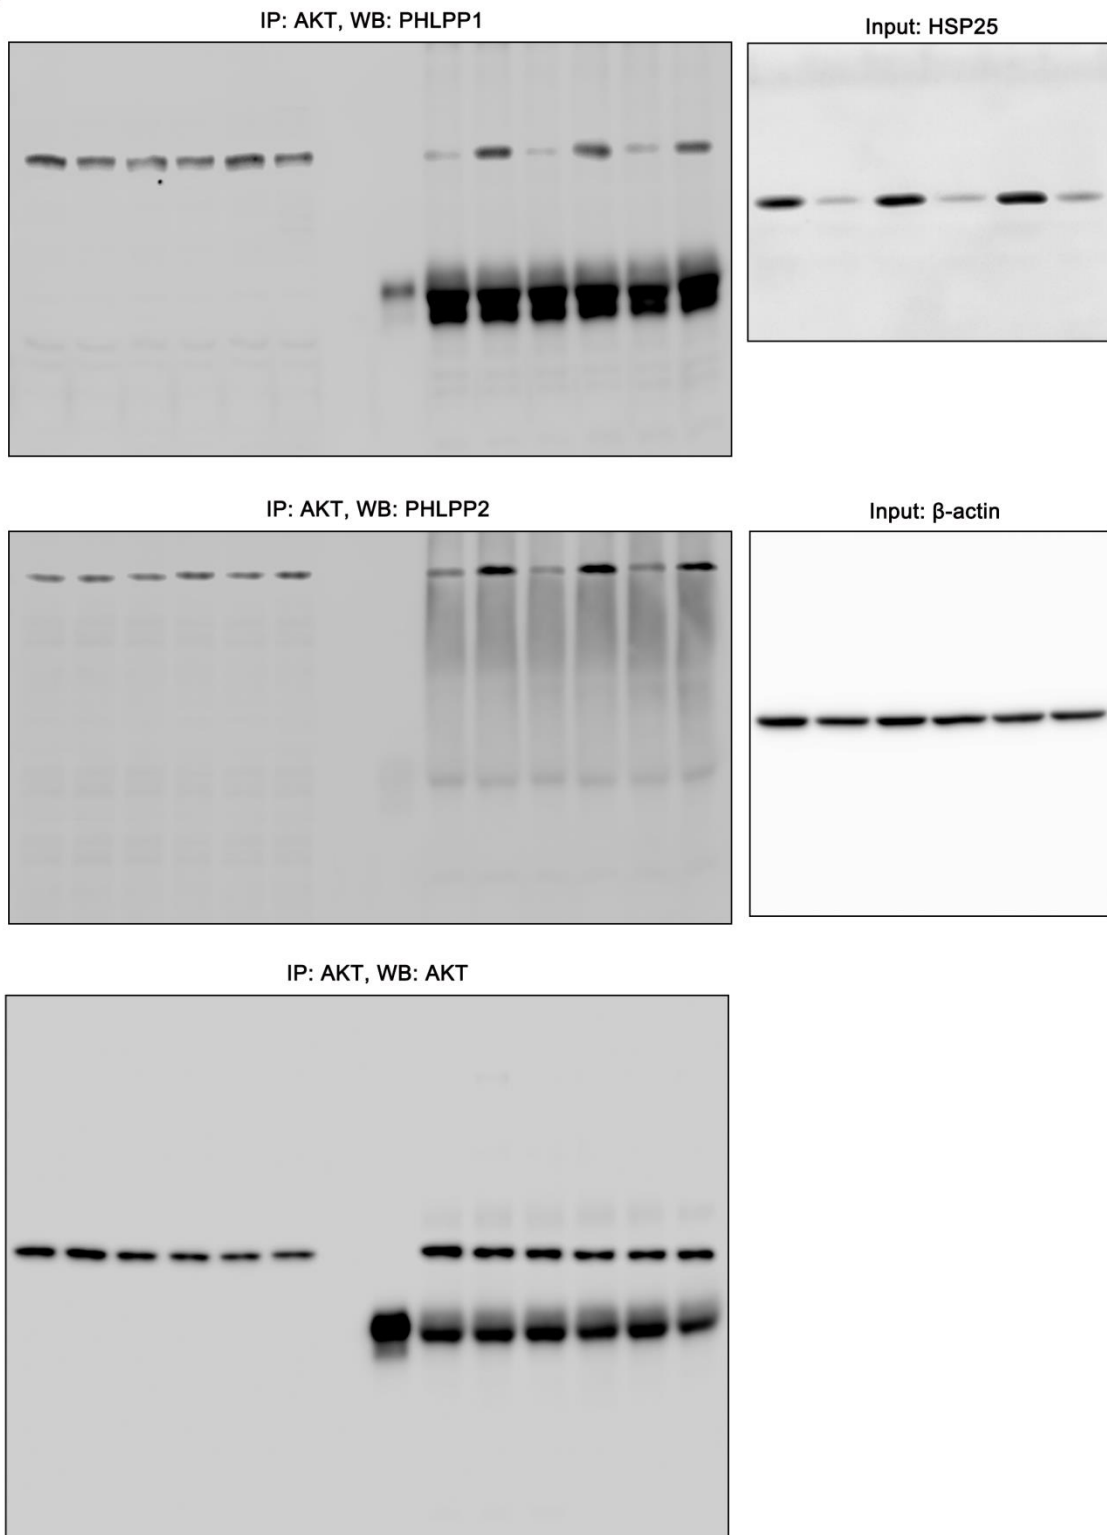

Supplementary Figure 10. Full-length gel images of Western blot data in Fig. 9C.
